# Supplementary material for: Balancing antimicrobial activity with biological safety: bifunctional chitosan derivative for the repair of wounds with Gram-positive bacterial infections
Source: Royal Society of Chemistry journal article supplement (doi:10.1039/c8tb00620b), 2018-01-01
Supplement: c8tb00620b1.pdf [file c8tb00620b1.pdf]

## Electronic Supplementary Information (ESI)

### Balancing Antimicrobial Activity with Biological Safety: Bifunctional Chitosan Derivative for the Repair of Wounds with Gram-positive Bacterial Infections

Meng Zhu, Peng Liu, Haigang Shi, Ye Tian, Xiaoyan Ju, Shidong Jiang, Zhuang Li, Man Wu, and Zhongwei Niu\*

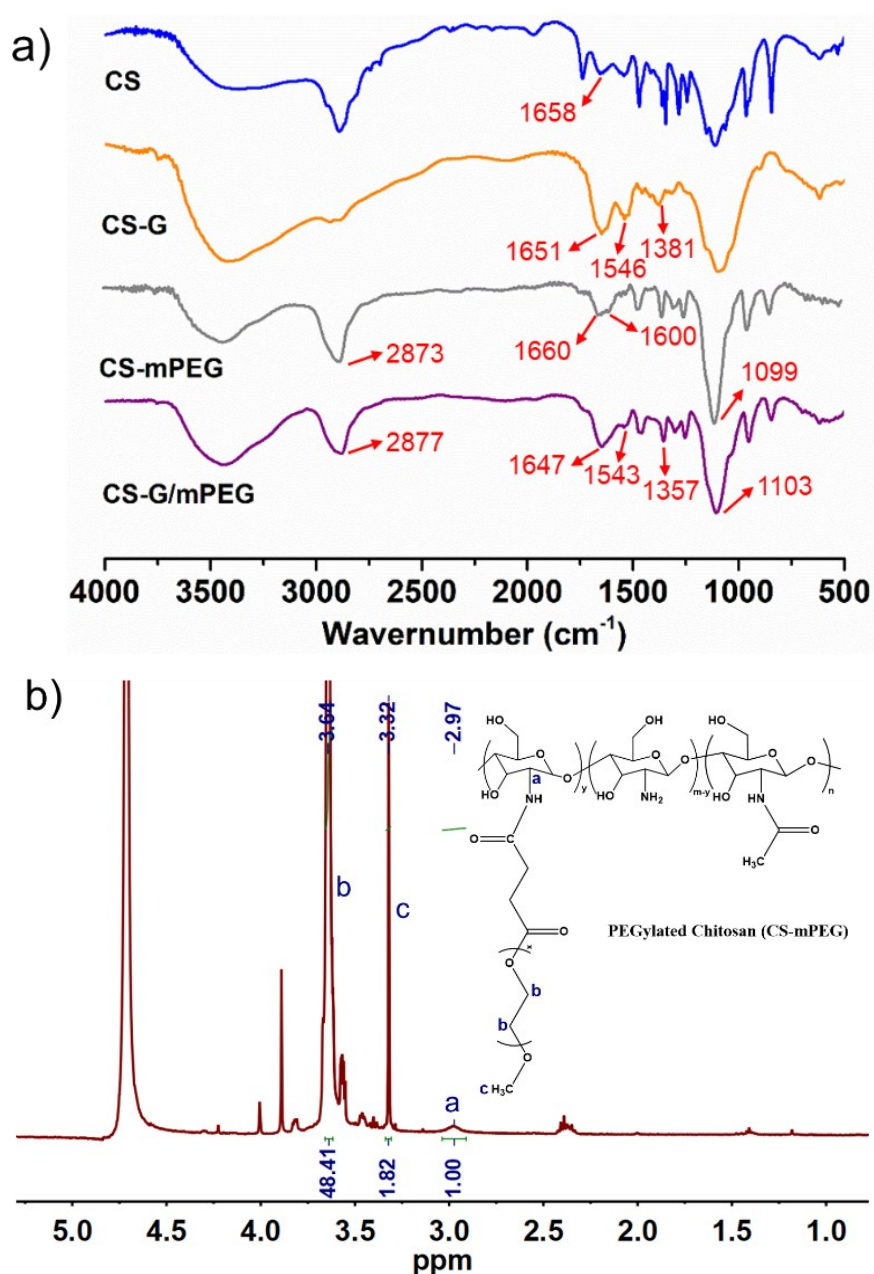

**Figure S1.** Characterization of chitosan and its derivatives. a) FTIR spectra and b)  $^1\text{H}$ -NMR spectra analysis of CS-mPEG.

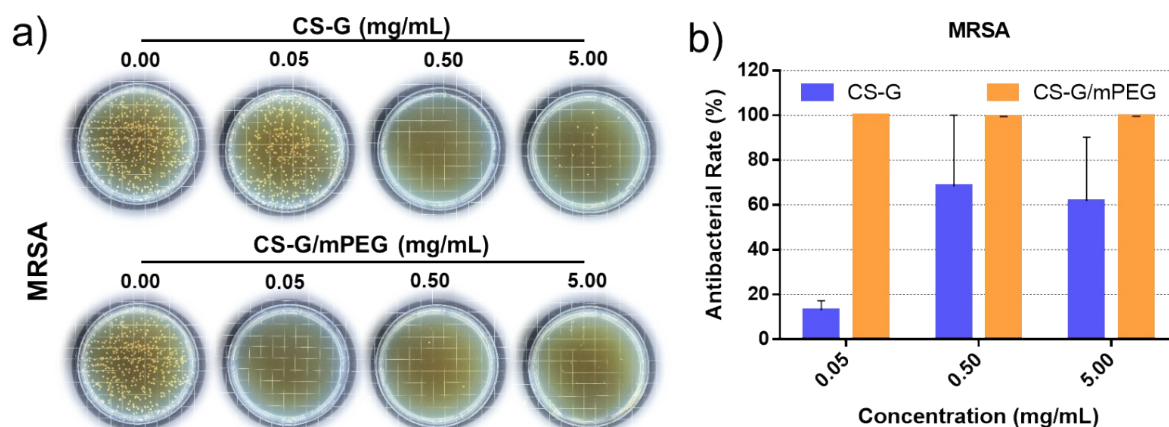

**Figure S2.** Testing antibacterial activity of modified chitosan CS-G and CS-G/mPEG. a) Typical photographs of microorganism colonies for MRSA treated with different polymer solutions on agar culture plates. b) Corresponding statistical histogram were graphed by prism software.

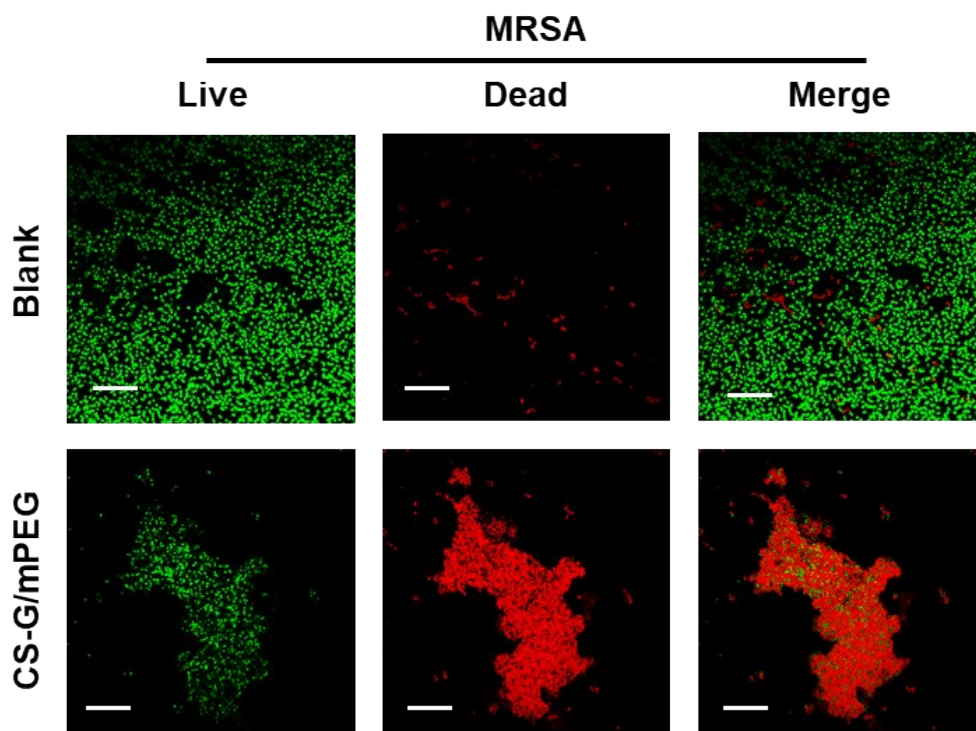

**Figure S3.** Confocal fluorescence microscopic images of MRSA cells treated with CS-G/mPEG ( $0.50 \text{ mg mL}^{-1}$ ) for 1 h. Cells were stained (for 15 min) with SYTO9 (green) and PI (red) for antimicrobial activity. Assay without CS-G/mPEG is as blank. (Scale bar:  $20 \mu\text{m}$ )

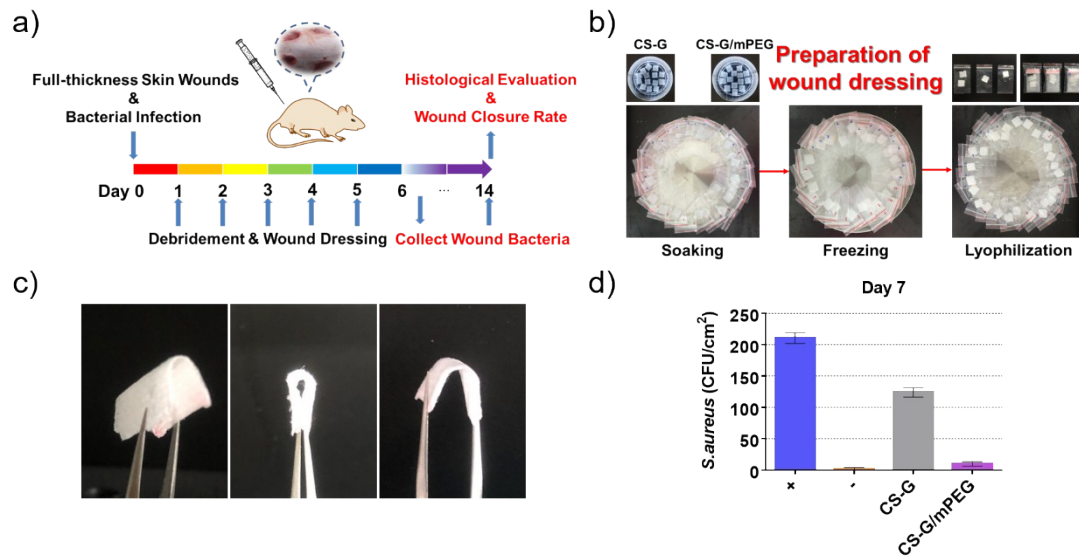

**Figure S4.** Infection control and healing promotion of modified chitosan *in vivo*. a) The protocol of bacterium-infected model establishment, including bacterial inoculation, treatment and harvest to figure out the histological evaluation antimicrobial rate and wound closure rate. b) Preparation of simple wound dressing based on CS-G and CS-G/mPEG. After soaking, freezing and lyophilization, dry clean simple wound dressings were obtained. c) Mechanical property of the wound dressings: modified chitosan attached clean wiper® was still soft enough to bend. d) Statistical histogram of the wound bacteria on day 7 postoperation were graphed by prism software.

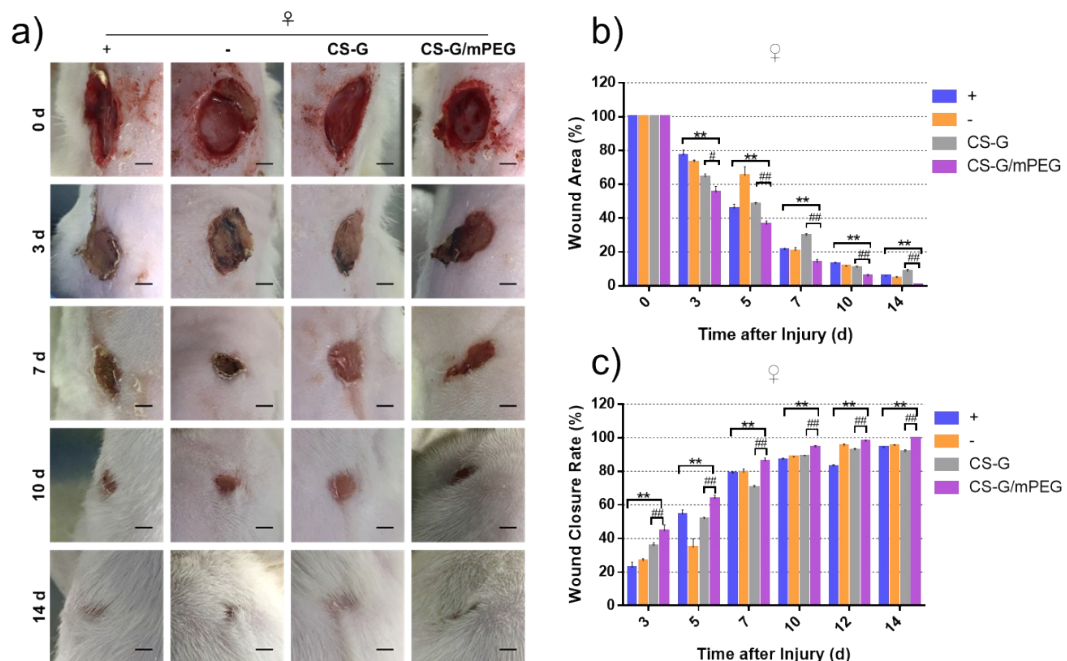

**Figure S5.** The wound healing processes under treatments of CS-G or CS-G/mPEG. a) Photographs of the appearance of different wounds on days 1, 3, 7, 10 and 14 postoperation with or without the treatment of the chitosan derivatives. +, -, CS-G, CS-G/mPEG group represent infected wounds without treatment, uninfected wounds without treatment, infected wounds treated with CS-G and infected wounds treated with CS-G/mPEG, respectively. (Scale bar: 5 mm) b) The proportion of the wound area on different days postoperation. c) The wound closure rate of different wounds on different days postoperation. (\*, # represent:  $p < 0.05$ ; \*\*, ## represent:  $p < 0.01$ )
